# Supplementary material for: Exact Hybrid Particle/Population Simulation of Rule-Based Models of Biochemical Systems
Source: PLoS Comput Biol. 2014 Apr 3;10(4):e1003544. doi: 10.1371/journal.pcbi.1003544 (PMC3974646; doi:10.1371/journal.pcbi.1003544)
Supplement: Dataset S1 — Average species populations from NFsim pre-simulations () of all example models considered in Fig. 9. (XLSX) [file pcbi.1003544.s001.xlsx]

## Sheet: actin_simple
actin_simple
population profiling
f=0.01
all species with mean pop >= 1 are reported
Species	Mean Population
ADF(a)	6020.04
Actin(barbed,c~OPEN,d,p~ATP,pointed)	6019.83

## Sheet: egfr_extended
egfr_extended
population profiling
f=0.01
all species with mean pop >= 1 are reported
Species	Mean Population
MEK(bind,loc~cyt,phos~U)	4093.9
ERK(bind!1,loc~cyt,phos~U).MEK(bind!1,loc~cyt,phos~U)	2332.68
ERK(bind,loc~cyt,phos~P)	1386.36
Ras(cat,nuc~GTP,raf)	1212.6
Ras(cat,nuc~GDP,raf)	967.983
MEK(bind,loc~cyt,phos~P)	664.967
PLCg(a,b~P,c~I)	565.793
ERK(bind,loc~nuc,phos~U)	497.868
ERK(bind,loc~nuc,phos~P)	463.033
Shc(PTB,Y317~pY)	450.05
ERK(bind,loc~cyt,phos~U)	324.281
Egf(r)	315.752
MEK(bind,loc~nuc,phos~U)	312.471
ERK(bind!1,loc~nuc,phos~U).MEK(bind!1,loc~nuc,phos~U)	306.769
Egfr(Y1068~Y,Y1148~Y,Y992~Y,d,l)	201.769
Grb2(SH2!1,SH3).Shc(PTB,Y317~pY!1)	201.719
Grb2(SH2!1,SH3!2).Shc(PTB,Y317~pY!1).Sos(dom!2,ras)	151.298
ERK(bind!1,loc~cyt,phos~U).MEK(bind!1,loc~cyt,phos~P)	105.76
Egf(r!1).Egfr(Y1068~Y,Y1148~Y,Y992~Y,d,l!1)	104.975
Grb2(SH2,SH3)	86.0744
Egf(r!1).Egf(r!2).Egfr(Y1068~Y,Y1148~Y,Y992~Y,d!3,l!1).Egfr(Y1068~Y,Y1148~Y,Y992~Y,d!3,l!2)	52.6942
MEK(bind,loc~nuc,phos~P)	49.8512
MEK(bind!1,loc~cyt,phos~U).Raf(bind!1,phos~P,ras!2).Ras(cat,nuc~GTP,raf!2)	40.3636
Shc(PTB,Y317~Y)	26.6116
Raf(bind,phos~P,ras!1).Ras(cat,nuc~GTP,raf!1)	20.7273
PLCg(a,b~P,c~0)	16.7025
ERK(bind!1,loc~nuc,phos~U).MEK(bind!1,loc~nuc,phos~P)	13.281
Egf(r!1).Egf(r!2).Egfr(Y1068~Y,Y1148~Y,Y992~Y,d!3,l!1).Egfr(Y1068~Y,Y1148~Y,Y992~pY,d!3,l!2)	11.4793
Raf(bind,phos~U,ras)	10.9256
Egf(r!1).Egf(r!2).Egfr(Y1068~Y,Y1148~Y,Y992~Y,d!3,l!1).Egfr(Y1068~pY,Y1148~Y,Y992~Y,d!3,l!2)	10.9091
Egf(r!1).Egf(r!2).Egfr(Y1068~Y,Y1148~Y,Y992~Y,d!3,l!1).Egfr(Y1068~Y,Y1148~pY,Y992~Y,d!3,l!2)	10.9008
Grb2(SH2,SH3!1).Sos(dom!1,ras)	10.5372
Sos(dom,ras)	9.34711
PLCg(a,b~0,c~0)	8.57025
Egf(r!1).Egf(r!2).Egfr(Y1068~Y,Y1148~Y,Y992~Y,d!3,l!1).Egfr(Y1068~Y,Y1148~pY!4,Y992~Y,d!3,l!2).Shc(PTB!4,Y317~pY)	3.47934
GAP(ras)	2.6281
Egf(r!1).Egf(r!2).Egfr(Y1068~Y,Y1148~Y,Y992~Y,d!3,l!2).Egfr(Y1068~pY!4,Y1148~Y,Y992~Y,d!3,l!1).Grb2(SH2!4,SH3)	2.61157
GAP(ras!1).Ras(cat!1,nuc~GTP,raf)	2.3719
Egf(r!1).Egf(r!2).Egfr(Y1068~Y,Y1148~Y,Y992~Y,d!3,l!1).Egfr(Y1068~pY!4,Y1148~Y,Y992~Y,d!3,l!2).Grb2(SH2!4,SH3!5).Ras(cat!6,nuc~GTP,raf).Sos(dom!5,ras!6)	2
Egf(r!1).Egfr(Y1068~pY!2,Y1148~Y,Y992~Y,d,l!1).Grb2(SH2!2,SH3)	1.7686
Egf(r!1).Egf(r!2).Egfr(Y1068~Y,Y1148~pY,Y992~Y,d!3,l!1).Egfr(Y1068~pY,Y1148~Y,Y992~Y,d!3,l!2)	1.27273
Egf(r!1).Egf(r!2).Egfr(Y1068~Y,Y1148~Y,Y992~pY,d!3,l!2).Egfr(Y1068~Y,Y1148~pY,Y992~Y,d!3,l!1)	1.24793
Egf(r!1).Egfr(Y1068~pY!2,Y1148~Y,Y992~Y,d,l!1).Grb2(SH2!2,SH3!3).Ras(cat!4,nuc~GTP,raf).Sos(dom!3,ras!4)	1.2314
Egf(r!1).Egf(r!2).Egfr(Y1068~Y,Y1148~Y,Y992~Y,d!3,l!1).Egfr(Y1068~pY,Y1148~Y,Y992~pY,d!3,l!2)	1.19835
Egf(r!1).Egf(r!2).Egfr(Y1068~Y,Y1148~Y,Y992~pY,d!3,l!2).Egfr(Y1068~pY,Y1148~Y,Y992~Y,d!3,l!1)	1.19008
Egfr(Y1068~pY!1,Y1148~Y,Y992~Y,d,l).Grb2(SH2!1,SH3)	1.18182
Egf(r!1).Egf(r!2).Egfr(Y1068~Y,Y1148~Y,Y992~Y,d!3,l!2).Egfr(Y1068~pY,Y1148~pY,Y992~Y,d!3,l!1)	1.16529
Egf(r!1).Egf(r!2).Egfr(Y1068~Y,Y1148~Y,Y992~Y,d!3,l!1).Egfr(Y1068~Y,Y1148~pY!4,Y992~Y,d!3,l!2).Grb2(SH2!5,SH3!6).Ras(cat!7,nuc~GTP,raf).Shc(PTB!4,Y317~pY!5).Sos(dom!6,ras!7)	1.15702
Egf(r!1).Egf(r!2).Egfr(Y1068~Y,Y1148~Y,Y992~Y,d!3,l!2).Egfr(Y1068~Y,Y1148~pY,Y992~pY,d!3,l!1)	1.12397
Egfr(Y1068~pY!1,Y1148~Y,Y992~Y,d,l).Grb2(SH2!1,SH3!2).Ras(cat!3,nuc~GTP,raf).Sos(dom!2,ras!3)	1.1157
Egf(r!1).Egfr(Y1068~Y,Y1148~pY!2,Y992~Y,d,l!1).Shc(PTB!2,Y317~pY)	1
Egf(r!1).Egf(r!2).Egfr(Y1068~Y,Y1148~Y,Y992~Y,d!3,l!2).Egfr(Y1068~pY!4,Y1148~Y,Y992~Y,d!3,l!1).Grb2(SH2!4,SH3!5).Ras(cat!6,nuc~GDP,raf).Sos(dom!5,ras!6)	1

## Sheet: fceri_gamma2
fceri_gamma2
population profiling
f=0.01
all species with mean pop >= 1 are reported
Species	Mean Population
Lig(l,l)	58745.1
Lyn(SH2,U)	959.264
Rec(a,b~Y,g~Y,g~Y)	787.686
Lig(l!1,l!2).Lyn(SH2!3,U).Lyn(SH2!4,U).Rec(a!1,b~pY!3,g~Y,g~Y).Rec(a!2,b~pY!4,g~Y,g~Y)	623.314
Lig(l!1,l!2).Lyn(SH2!3,U).Lyn(SH2!4,U).Rec(a!1,b~pY!3,g~Y,g~Y).Rec(a!2,b~pY!4,g~Y,g~pY)	372.025
Lyn(SH2,U!1).Rec(a,b~Y!1,g~Y,g~Y)	260.529
Lig(l!1,l!2).Lyn(SH2!3,U).Lyn(SH2!4,U).Rec(a!1,b~pY!3,g~Y,g~Y).Rec(a!2,b~pY!4,g~Y,g~pY!5).Syk(a~Y,l~pY,tSH2!5)	119.074
Lig(l!1,l!2).Lyn(SH2!3,U).Rec(a!1,b~pY!3,g~Y,g~Y).Rec(a!2,b~pY,g~Y,g~Y)	60.5537
Lig(l!1,l!2).Lyn(SH2!3,U).Lyn(SH2!4,U).Rec(a!1,b~pY!3,g~Y,g~pY).Rec(a!2,b~pY!4,g~Y,g~pY)	56.1901
Lig(l!1,l!2).Lyn(SH2!3,U).Lyn(SH2!4,U).Rec(a!1,b~pY!3,g~Y,g~pY!5).Rec(a!2,b~pY!4,g~Y,g~pY).Syk(a~Y,l~pY,tSH2!5)	36.1074
Lig(l!1,l!2).Lyn(SH2!3,U).Lyn(SH2!4,U).Rec(a!1,b~pY!3,g~Y,g~Y).Rec(a!2,b~pY!4,g~pY,g~pY)	26.7769
Lig(l!1,l!2).Lyn(SH2!3,U).Lyn(SH2!4,U).Rec(a!2,b~pY!4,g~Y,g~Y).Rec(a!1,b~pY!3,g~Y,g~pY!5).Syk(a~Y,l~Y,tSH2!5)	23.5702
Lig(l!1,l!2).Lyn(SH2!3,U).Rec(a!1,b~pY!3,g~Y,g~Y).Rec(a!2,b~pY,g~Y,g~pY)	18.4463
Lig(l!1,l!2).Rec(a!1,b~Y,g~Y,g~Y).Rec(a!2,b~Y,g~Y,g~Y)	18.3306
Lig(l!1,l!2).Lyn(SH2!3,U).Lyn(SH2!4,U).Rec(a!1,b~pY!3,g~Y,g~Y).Rec(a!2,b~pY!4,g~pY!5,g~pY).Syk(a~Y,l~pY,tSH2!5)	17.8595
Syk(a~Y,l~Y,tSH2)	14.9339
Lig(l!1,l!2).Lyn(SH2!3,U).Rec(a!1,b~Y,g~Y,g~Y).Rec(a!2,b~pY!3,g~Y,g~Y)	12.1736
Lig(l!1,l!2).Lyn(SH2!3,U).Lyn(SH2!4,U).Rec(a!1,b~pY!3,g~Y,g~pY).Rec(a!2,b~pY!4,g~pY,g~pY)	8.33884
Lig(l!1,l!2).Lyn(SH2!3,U).Lyn(SH2!4,U).Rec(a!2,b~pY!4,g~Y,g~pY!5).Rec(a!1,b~pY!3,g~Y,g~pY).Syk(a~Y,l~Y,tSH2!5)	6.46281
Lig(l!1,l!2).Lyn(SH2!3,U).Lyn(SH2!4,U).Rec(a!1,b~pY!3,g~Y,g~pY!5).Rec(a!2,b~pY!4,g~Y,g~pY!6).Syk(a~pY,l~pY,tSH2!5).Syk(a~pY,l~pY,tSH2!6)	5.33884
Lig(l!1,l!2).Lyn(SH2!3,U).Rec(a!1,b~pY!3,g~Y,g~Y).Rec(a!2,b~pY,g~Y,g~pY!4).Syk(a~Y,l~pY,tSH2!4)	5.06612
Lig(l!1,l!2).Lyn(SH2!3,U).Lyn(SH2!4,U).Rec(a!2,b~pY!4,g~Y,g~pY).Rec(a!1,b~pY!3,g~pY!5,g~pY).Syk(a~Y,l~pY,tSH2!5)	4.93388
Lig(l!1,l!2).Lyn(SH2!3,U).Rec(a!1,b~pY!3,g~Y,g~pY!4).Rec(a!2,b~pY,g~Y,g~Y).Syk(a~Y,l~Y,tSH2!4)	4.79339
Lig(l!1,l!2).Lyn(SH2!3,U).Rec(a!2,b~Y,g~Y,g~pY).Rec(a!1,b~pY!3,g~Y,g~Y)	3.61157
Lig(l!1,l!2).Lyn(SH2!3,U).Lyn(SH2!4,U).Rec(a!1,b~pY!3,g~Y,g~Y).Rec(a!2,b~pY!4,g~pY!5,g~pY).Syk(a~Y,l~Y,tSH2!5)	3.5124
Lig(l!1,l!2).Lyn(SH2!3,U).Lyn(SH2!4,U).Rec(a!1,b~pY!3,g~Y,g~Y).Rec(a!2,b~pY!4,g~pY!5,g~pY!6).Syk(a~Y,l~pY,tSH2!5).Syk(a~Y,l~pY,tSH2!6)	3.43802
Lig(l!1,l!2).Lyn(SH2,U!3).Rec(a!1,b~Y!3,g~Y,g~Y).Rec(a!2,b~Y,g~Y,g~Y)	2.94215
Lig(l!1,l!2).Lyn(SH2!3,U).Lyn(SH2!4,U).Rec(a!1,b~pY!3,g~Y,g~pY!5).Rec(a!2,b~pY!4,g~pY,g~pY).Syk(a~Y,l~pY,tSH2!5)	2.67769
Lig(l!1,l!2).Lyn(SH2!3,U).Lyn(SH2!4,U).Rec(a!1,b~pY!3,g~Y,g~pY!5).Rec(a!2,b~pY!4,g~Y,g~pY!6).Syk(a~pY,l~Y,tSH2!5).Syk(a~pY,l~pY,tSH2!6)	2.41322
Lig(l!1,l!2).Lyn(SH2,U!3).Rec(a!2,b~Y!3,g~Y,g~Y).Rec(a!1,b~pY,g~Y,g~Y)	2.27273
Lig(l!1,l!2).Lyn(SH2!3,U).Lyn(SH2,U!4).Rec(a!1,b~Y!4,g~Y,g~Y).Rec(a!2,b~pY!3,g~Y,g~Y)	2.26446
Lig(l!1,l!2).Rec(a!1,b~Y,g~Y,g~Y).Rec(a!2,b~Y,g~Y,g~pY!3).Syk(a~Y,l~Y,tSH2!3)	2.01653
Lig(l!1,l!2).Rec(a!1,b~Y,g~Y,g~Y).Rec(a!2,b~pY,g~Y,g~Y)	1.96694
Lig(l!1,l!2).Lyn(SH2!3,U).Rec(a!1,b~pY!3,g~Y,g~pY).Rec(a!2,b~pY,g~Y,g~Y)	1.71074
Lig(l!1,l!2).Lyn(SH2!3,U).Lyn(SH2!4,U).Rec(a!2,b~pY!4,g~Y,g~pY!5).Rec(a!1,b~pY!3,g~pY!6,g~pY).Syk(a~pY,l~pY,tSH2!6).Syk(a~pY,l~pY,tSH2!5)	1.65289
Lig(l!1,l!2).Lyn(SH2!3,U).Rec(a!2,b~pY!3,g~Y,g~Y).Rec(a!1,b~pY,g~pY,g~pY)	1.47934
Lig(l!1,l!2).Lyn(SH2!3,U).Rec(a!1,b~pY!3,g~Y,g~pY!4).Rec(a!2,b~pY,g~Y,g~pY).Syk(a~Y,l~Y,tSH2!4)	1.38843
Lig(l!1,l!2).Lyn(SH2!3,U).Rec(a!1,b~pY!3,g~Y,g~Y).Rec(a!2,b~pY,g~Y,g~pY!4).Syk(a~Y,l~Y,tSH2!4)	1.20661
Lig(l!1,l!2).Lyn(SH2!3,U).Lyn(SH2!4,U).Rec(a!1,b~pY!3,g~Y,g~Y).Rec(a!2,b~pY!4,g~pY!5,g~pY!6).Syk(a~Y,l~Y,tSH2!5).Syk(a~Y,l~pY,tSH2!6)	1.20661
Lig(l!1,l!2).Lyn(SH2!3,U).Rec(a!2,b~Y,g~Y,g~pY!4).Rec(a!1,b~pY!3,g~Y,g~Y).Syk(a~Y,l~pY,tSH2!4)	1.19008
Lig(l!1,l!2).Lyn(SH2!3,U).Lyn(SH2!4,U).Rec(a!2,b~pY!4,g~Y,g~pY).Rec(a!1,b~pY!3,g~pY!5,g~pY).Syk(a~Y,l~Y,tSH2!5)	1.1405
Syk(a~Y,l~pY,tSH2)	1.06612
Lig(l!1,l!2).Lyn(SH2!3,U).Lyn(SH2!4,U).Rec(a!1,b~pY!3,g~Y,g~pY!5).Rec(a!2,b~pY!4,g~Y,g~pY!6).Syk(a~Y,l~pY,tSH2!5).Syk(a~pY,l~pY,tSH2!6)	1.04132

## Sheet: tlbr
tlbr
population profiling
f=0.01
all species with mean pop >= 1 are reported
Species	Mean Population
L(r,r,r)	47222
R(l,l)	73.505
L(r,r,r!1).R(l,l!1)	43.8317
L(r,r,r!1).L(r,r,r!2).R(l!2,l!1)	43.3069
L(r,r,r!1).L(r,r,r!2).L(r,r!3,r!4).R(l!2,l!3).R(l!1,l!4)	20.9208
L(r,r,r!1).L(r,r!2,r!3).R(l!2,l!1).R(l,l!3)	17.3564
L(r,r,r!1).L(r,r,r!2).L(r,r!3,r!4).L(r,r!5,r!6).R(l!4,l!6).R(l!3,l!2).R(l!5,l!1)	9.0297
L(r,r!1,r!2).R(l,l!2).R(l,l!1)	8.66337
L(r,r!1,r!2).L(r,r!3,r!4).L(r,r,r!5).R(l!1,l!3).R(l!2,l!5).R(l,l!4)	7.11881
L(r,r!1,r!2).L(r,r!3,r!4).L(r,r!5,r!6).L(r,r,r!7).L(r,r,r!8).R(l!5,l!1).R(l!3,l!2).R(l!6,l!7).R(l!4,l!8)	4.29703
L(r,r!1,r!2).L(r,r!3,r!4).L(r,r!5,r!6).L(r,r,r!7).R(l!1,l!3).R(l!2,l!5).R(l!4,l!7).R(l,l!6)	3.66337
L(r!1,r!2,r!3).R(l,l!3).R(l,l!2).R(l,l!1)	2.68317
L(r,r!1,r!2).L(r,r!3,r!4).R(l!4,l!2).R(l,l!3).R(l,l!1)	2.24752
L(r!1,r!2,r!3).L(r,r,r!4).L(r,r,r!5).R(l!1,l!5).R(l!2,l!4).R(l,l!3)	2.19802
L(r,r!1,r!2).L(r,r!3,r!4).L(r,r!5,r!6).L(r,r!7,r!8).L(r,r,r!9).L(r,r,r!10).R(l!4,l!2).R(l!3,l!5).R(l!1,l!7).R(l!6,l!9).R(l!8,l!10)	1.9505
L(r!1,r!2,r!3).L(r,r!4,r!5).L(r,r,r!6).L(r,r,r!7).L(r,r,r!8).R(l!8,l!5).R(l!7,l!1).R(l!6,l!2).R(l!4,l!3)	1.85149
L(r!1,r!2,r!3).L(r,r!4,r!5).L(r,r,r!6).L(r,r,r!7).R(l!7,l!5).R(l!6,l!1).R(l!4,l!2).R(l,l!3)	1.70297
L(r!1,r!2,r!3).L(r,r,r!4).R(l!3,l!4).R(l,l!2).R(l,l!1)	1.60396
L(r!1,r!2,r!3).L(r,r!4,r!5).R(l!3,l!5).R(l,l!2).R(l,l!1).R(l,l!4)	1.56436
L(r,r,r!1).L(r,r,r!2).L(r,r,r!3).L(r!4,r!5,r!6).R(l!3,l!4).R(l!2,l!5).R(l!1,l!6)	1.50495
L(r,r!1,r!2).L(r,r!3,r!4).L(r,r!5,r!6).L(r,r!7,r!8).L(r,r,r!9).R(l!1,l!3).R(l!2,l!5).R(l!4,l!7).R(l!6,l!9).R(l,l!8)	1.33663
L(r!1,r!2,r!3).L(r,r!4,r!5).L(r,r,r!6).R(l!1,l!6).R(l!2,l!4).R(l,l!3).R(l,l!5)	1.14851
L(r!1,r!2,r!3).L(r,r!4,r!5).L(r,r!6,r!7).L(r,r,r!8).L(r,r,r!9).L(r,r,r!10).R(l!7,l!8).R(l!5,l!9).R(l!6,l!1).R(l!4,l!2).R(l!10,l!3)	1.10891
L(r!1,r!2,r!3).L(r,r!4,r!5).L(r,r,r!6).L(r,r,r!7).R(l!4,l!3).R(l!7,l!1).R(l!6,l!2).R(l,l!5)	1.08911
